# Supplementary material for: Analysis of the Genome and Transcriptome of Cryptococcus neoformans var. grubii Reveals Complex RNA Expression and Microevolution Leading to Virulence Attenuation
Source: PubMed Central journal article supplement (PMC3990503; doi:10.1371/journal.pgen.1004261), 2014-04-17

**A**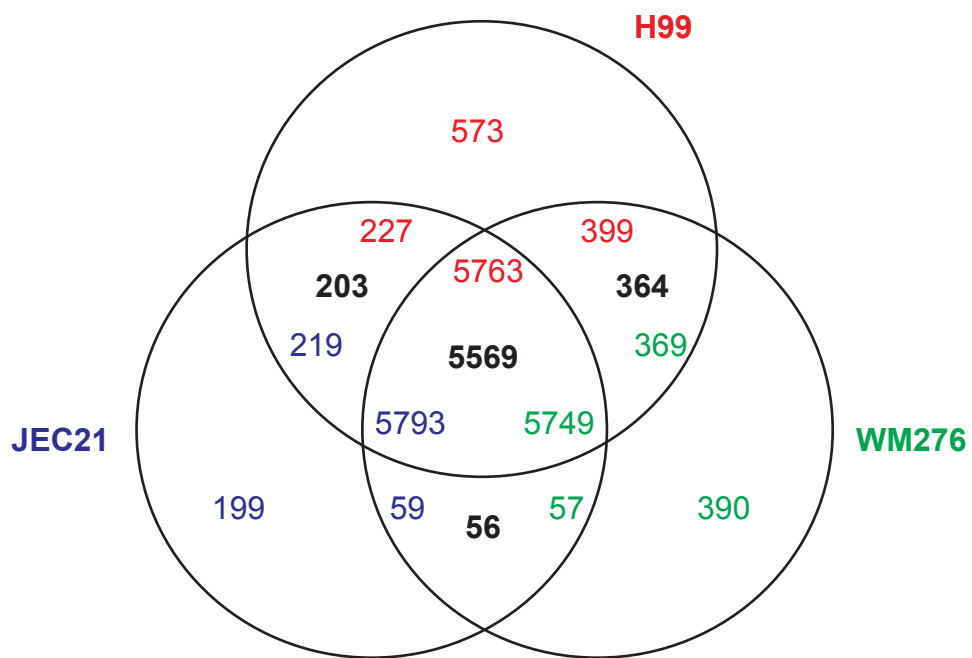**B**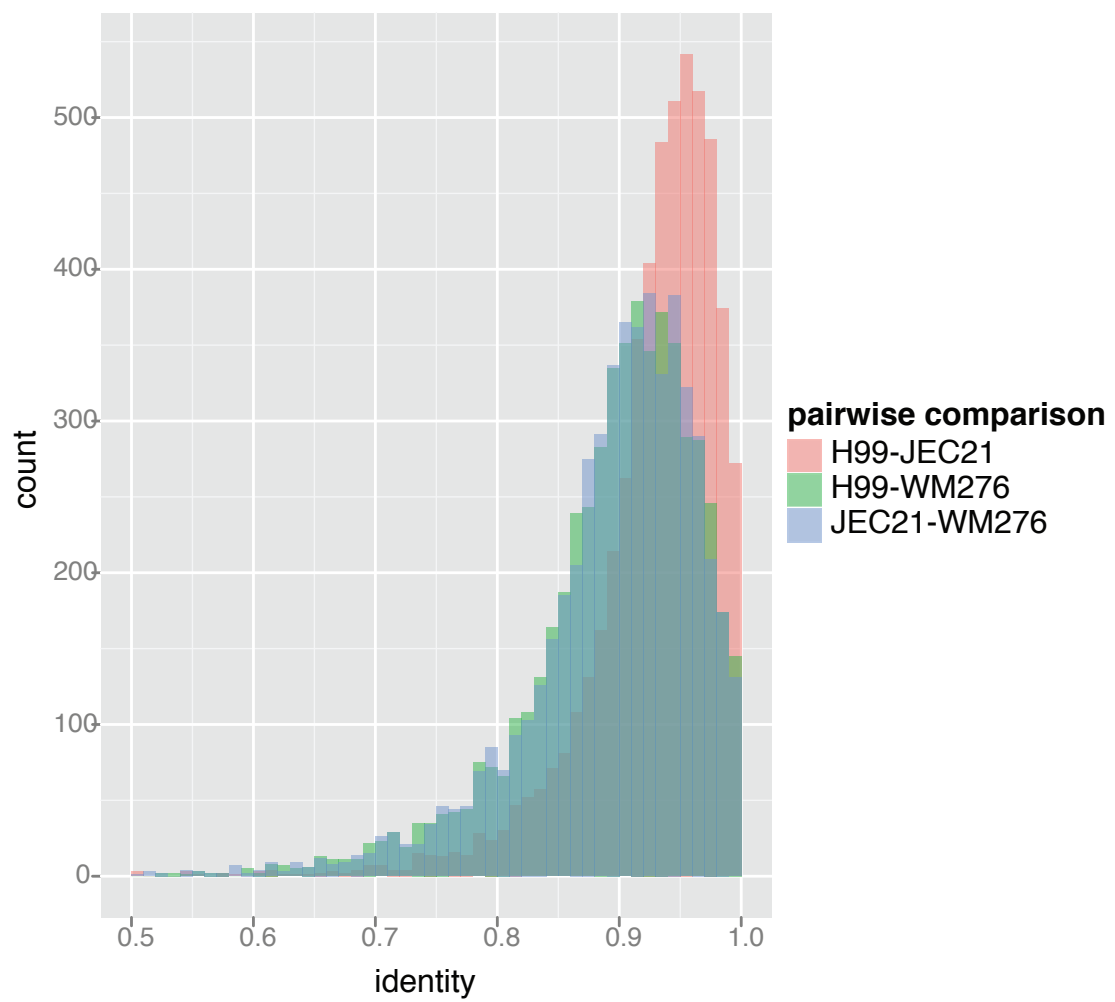

Supplement: pgen.1004261.s001.pdf [file pgen.1004261.s001.pdf]
