# Supplementary material for: Analysis of the Genome and Transcriptome of Cryptococcus neoformans var. grubii Reveals Complex RNA Expression and Microevolution Leading to Virulence Attenuation
Source: PLoS Genet. 2014 Apr 17;10(4):e1004261. doi: 10.1371/journal.pgen.1004261 (PMC3990503; doi:10.1371/journal.pgen.1004261)
Supplement: Table S11 — List of the Bioprojects associated with the present study. (XLS) [file pgen.1004261.s021.xls]

## Sheet: Sheet1
Table S11	List of the Bioprojects related to the present study
NCBI BioProject	Data
PRJNA411	H99 genome and annotation
PRJNA191473	H99 RNA-Seq, LIM, replicate 1
PRJNA191474	H99 RNA-Seq, LIM, replicate 2
PRJNA191471	H99 RNA-Seq, PG replicate 1
PRJNA191472	H99 RNA-Seq, PG replicate 2
PRJNA191469	H99 RNA-Seq, YPD replicate 1
PRJNA191470	H99 RNA-Seq, YPD replicate 2
PRJEB4169	KN99alpha RNA-Seq (6 conditions, two replicates)
PRJNA230886	H99S, H99W and H99ED genome sequences
